1 **Qualitative assessment of SARS-CoV-2-specific antibody avidity by lateral flow**  
2 **immunochromatographic IgG/IgM antibody assay**

3 Arantxa Valdivia<sup>1</sup>, Ignacio Torres<sup>1</sup>, Dixie Huntley<sup>1</sup>, María Jesús Alcaraz<sup>1</sup>, Eliseo  
4 Albert<sup>1</sup>, Javier Colomina<sup>1</sup>, Josep Ferrer<sup>1</sup>, Arturo Carratalá<sup>2</sup>, David Navarro<sup>1,3</sup>

5 <sup>1</sup>*Microbiology Service, Hospital Clínico Universitario, INCLIVA Research Institute,*  
6 *Valencia, Spain.*

7 <sup>2</sup>*Medical Biochemistry and Clinical Analysis Service, Hospital Clínico Universitario,*  
8 *INCLIVA Research Institute, Valencia, Spain.*

9 <sup>3</sup>*Department of Microbiology, School of Medicine, University of Valencia, Valencia,*  
10 *Spain.*

11

12 **Correspondence:** David Navarro, Microbiology Service, Hospital Clínico  
13 Universitario, Instituto de Investigación INCLIVA, Valencia, and Department of  
14 Microbiology, University of Valencia, Valencia, Spain. Av. Blasco Ibáñez 17, 46010  
15 Valencia, Spain. Phone: 34(96)1973500; Fax: 34(96)3864173; Email:  
16 david.navarro@uv.es.

17

18

19

20

21

22

23

24 **Abstract**

25 Qualitative assessment of SARS-CoV-2-specific antibody avidity was conducted using  
26 an urea (6M) dissociation test performed on a lateral flow immunochromatographic  
27 IgG/IgM device. We included a total of 76 serum specimens collected from 57 COVID-  
28 19 patients, of which 39 tested positive for both IgG and IgM and 37 only for IgG. Sera  
29 losing IgG reactivity after urea treatment (n=28) were drawn significantly earlier  
30 ( $P=0.04$ ) after onset of symptoms than those which preserved it (n=48). This assay may  
31 be helpful to estimate the time of acquisition of infection in patients with mild to severe  
32 COVID-19.

33

34 **Key words:** SARS-CoV-2, Covid-19, antibodies, avidity, urea dissociation.

35

36

37

38

39

40

41

42

43

44

45 Detection of SARS-CoV-2 RNA in respiratory tract specimens by reverse-transcription-  
46 based PCR (RT-PCR) assays is the mainstay of COVID-19 diagnosis [1]. However, a  
47 non-negligible fraction of COVID-19 patients test negative by RT-PCR on initial or  
48 consecutive upper respiratory tract specimens, due to a number of non-mutually  
49 exclusive pre-analytical or analytical factors [2]. Although serology testing is mainly  
50 aimed at identifying individuals who have previously been exposed to SARS-CoV-2, it  
51 may also aid in diagnosis of ongoing COVID-19, particularly in RT-PCR negative  
52 patients who present at relatively late times after infection [3]. Knowledge of the precise  
53 timing of infection may be of clinical and epidemiological relevance as viral shedding  
54 in the upper respiratory tract (URT) seems to continue up to 7-9 days after onset of  
55 symptoms in patients presenting with mild or moderate COVID-19 [4-6]. Often enough,  
56 however, this cannot be accurately determined. Theoretically, virus-specific serum IgM  
57 antibodies appear as soon as 7 days after infection and precede IgG seroconversion [7].  
58 Nevertheless, both synchronous seroconversion of IgG and IgM, and IgM  
59 seroconversion occurring later than IgG have been documented in the setting of  
60 COVID-19 [8], casting doubt on the reliability of SARS-CoV-2 IgM as a biomarker of  
61 acute infection. Affinity maturation is a process by which Th<sub>2</sub>-cell-activated B cells  
62 produce IgG antibodies with increased affinity for the antigen during the course of an  
63 immune response [9], and avidity is defined as the combined affinities of a mixture of  
64 polyclonal IgG molecules [10]. Presence of low-avidity IgGs has conventionally been  
65 considered an indicator of recent infection [10]. Here, we carried out qualitative  
66 assessment of SARS-CoV-2-specific antibody avidity using an urea dissociation test  
67 performed on a lateral flow immunochromatographic device-LFIC- [11], and also  
68 discuss the potential clinical use of this approach.

69 A total of 76 serum specimens collected from 57 COVID-19 patients were included in  
70 this study. Microbiological diagnosis of COVID-19 was made by RT-PCR in 44  
71 patients, using commercially-available RT-PCRs on upper respiratory tract specimens  
72 (URT) [12,13], and by lateral flow immunochromatographic (LFIC) assay in the  
73 remaining 13 patients (described below). Median age of patients (32 male and 25  
74 female) was 66 years (range, 27-99 years). Forty-seven patients were admitted to our  
75 center with pneumonia, while the remaining 10 patients presented with mild symptoms  
76 not requiring hospitalization. Comorbid conditions including diabetes, cardiovascular  
77 diseases, chronic obstructive pulmonary disease or malignancies were identified in 47  
78 patients. Clinical charts were reviewed to establish the time of onset of symptoms. The  
79 current study was approved by the Ethics Committee of Hospital Clínico Universitario  
80 INCLIVA.

81 Qualitative assessment of SARS-CoV-2 antibody avidity was carried out using the  
82 ALLTEST 2019-nCoV IgG/IgM Rapid Test Cassette (Hangzhou ALLTEST Biotech  
83 Co., Ltd. Hangzhou, China), which uses a recombinant SARS-CoV-2 N protein as the  
84 antigen, following the manufacturer's recommendations [14]. Cryopreserved specimens  
85 (-80°C) were thawed and used for the experiments. A volume of 10µL of serum was  
86 diluted into 1 mL of sample buffer before depositing (100 µL) into the appropriate  
87 location of the cassette (Test T-hole). When the fluid was about to reach the absorbent  
88 pad, 100 µL of sample buffer containing 6M urea was added to the T hole on the card.  
89 Serum specimens were run in parallel in the absence of urea treatment. Each reading  
90 was carried out independently by two observers after 20 min incubation. Appearance of  
91 either strong or weak sharp bands at the T line was recorded as a positive result.  
92 Absence of discernible lines was recorded as negative. Complete disappearance of

93 reactive lines after urea treatment was interpreted as presence of low-avidity antibodies,  
94 whereas their persistence was taken to indicate high-avidity antibody presence.

95 The Mann-Whitney U-test was used for comparison of medians.  $P$  values  $<0.05$  were  
96 deemed to be statistically significant. The statistical package SPSS, version 21.0 (SPSS  
97 Inc., USA) was employed.

98 Out of the 76 sera, 39 tested positive for both IgG and IgM and 37 only for IgG.  
99 IgG+/IgM+ and IgG+/IgM- sera were obtained at a median of 20 days (range, 1-48  
100 days) and 24 days (range, 6-59) after onset of symptoms, respectively ( $P=0.13$ ). In line  
101 with previous observations [8], our data highlighted the wide variability in the kinetics  
102 of IgM and IgG detection across Covid-19 patients, which detracted from the reliability  
103 of IgM presence as a marker of acute infection.

104 Following urea treatment, IgG reactivity disappeared in 28 sera and persisted in 48. Sera  
105 losing IgG reactivity were obtained significantly earlier ( $P=0.04$ ) after onset of  
106 symptoms than those preserving it (median, 14.5 days; range, 1-45 days vs. median, 23  
107 days; range, 5-59 days, respectively), although a certain degree of overlap was seen.  
108 Based upon the assumption that viable SARS-CoV-2 can be detected in URT specimens  
109 up to 9 days after symptoms onset [4-6], we grouped sera into two categories according  
110 to whether they were drawn either prior to ( $n=10$ ) or after day 9 ( $n=66$ ) since symptoms  
111 onset. Low-avidity IgGs were detected in 8 out of the 10 former sera, and in 21 of the  
112 66 latter sera ( $P=0.01$ ).

113 At least two consecutive sera were available from 15 patients (Table 1). Acquisition of  
114 high-avidity IgG antibodies in our system was clearly time-dependent, usually occurring  
115 3 weeks after onset of symptoms, although in a few patients it could be documented

116 earlier (patients 4, 5 and 15). This observation is in keeping with the idea that the  
117 dynamics of antibody affinity maturation varies across individuals [7,10].

118 IgM reactivity was lost in 17 out of 39 sera after urea dissociation treatment, whereas it  
119 remained in 22. The time elapsed since onset of symptoms did not differ across  
120 comparison groups (median 24 days; range 1-45 days vs. 14.5 days; range 2-48 days,  
121 respectively;  $P=0.14$ ). Sera testing positive for rheumatoid factor (RF) IgM have been  
122 shown to yield false-positive IgM reactivity in a SARS-CoV-2 LFIC assay, and it has  
123 been reported that RF interference could be eliminated in most sera after urea  
124 dissociation [11]. This observation was validated in the current study: 5 out of 14 sera  
125 with leftover sample available that had lost IgM reactivity in the presence of urea tested  
126 positive for RF (median 18 IU/ml; range, 17 to 46 IU/ml; normal values <14 IU/ml).  
127 Collectively, these data suggest that SARS-CoV-2 N protein-reactive IgM avidity may  
128 vary across Covid-19 patients, regardless of the infection acquisition time; elucidation  
129 of whether this variability may impact on IgM functionality, and ultimately on Covid-19  
130 prognosis could be an interesting focus of future research.

131 A total of 9 sera from patients with seasonal human coronavirus infection occurring  
132 prior to the epidemic outbreak in our Health Department were also included in the  
133 current study. Coronaviruses were detected in URT specimens by a multiplex PCR  
134 assay (The NxTAG® Respiratory Pathogen Panel; Luminex Corp, Austin, TX, USA).  
135 Seven patients had coronavirus 229E and 2 patients had dual infections caused by  
136 coronavirus 229E and HKU1 and coronavirus 229E and NL63. Sera had been obtained  
137 at a median of 3 weeks after diagnosis. Only one of the 9 sera tested IgG-positive, yet  
138 reactivity was lost following urea treatment. This suggested, but did not prove, that IgG  
139 antibodies targeting seasonal coronaviruses and cross-reacting with SARS-CoV-2 may  
140 display low avidity.

141 In summary, we adapted a commercially-available LFIC IgG/IgM assay for qualitative  
142 assessment of SARS-CoV-2 antibody avidity that may be helpful to estimate the time of  
143 acquisition of infection in patients with mild to severe COVID-19. Our approach should  
144 be validated using conventional quantitative ELISA or CLIA avidity assays and also in  
145 cohorts including both asymptomatic and paucisymptomatic individuals. Further studies  
146 are warranted to elucidate how the kinetics of IgG avidity maturation correlates with  
147 that of virus excretion in the URT, to determine the extent to which contagiousness of  
148 COVID-19 patients can be inferred from absence of high-avidity IgGs and determine  
149 whether avidity of SARS-CoV-2-specific IgGs impact on clinical outcomes.

#### 150 **Acknowledgements**

151 We are grateful to all personnel working at Microbiology Service of Hospital Clínico  
152 Universitario for their unwavering commitment in the fight against Covid-19. We are  
153 indebted to all colleagues who attended the patients, in particular to Josep Redón, María  
154 Luisa Blasco, Jaime Signes-Costa, María José Galindo, and María José Forner.

#### 155 **Funding information**

156 No public or private funds were used for the current study.

#### 157 **Compliance with ethical standards**

#### 158 **Conflict of interest**

159 The authors declare no conflicts of interest.

#### 160 **Ethical approval**

161 The current study was approved by the Ethics Committee of Hospital Clínico  
162 Universitario INCLIVA (2020-04).

163 **Informed consent**

164 Written informed consent was waived by the Ethics committee.

165 **References**

166 1. Laboratory testing strategy recommendations for COVID-19: interim guidance.

167 WHO/2019-nCoV/lab\_testing/2020.1

168 2. Arevalo-Rodriguez I, Buitrago-Garcia D, Simancas-Racines D, Zambrano-Achig P,

169 del Campo R, Ciapponi A, et al. False-negative results of initial RT-PCR assays for

170 Covid-19: a systematic review. *MedRxiv preprint* 2020; doi:

171 <https://doi.org/10.1101/2020.04.16.20066787>.

172 3. Özçürümez MK, Ambrosch A, Frey O, Haselmann V, Holdenrieder S, Kiehntopf M,

173 et al. SARS-CoV-2 Antibody Testing - Questions to be asked. *J Allergy Clin Immunol.*

174 2020 ; S0091-6749(20)30739-9. doi: 10.1016/j.jaci.2020.05.020.

175 4. T To KK, Tsang OT, Leung WS, Tam AR, Wu TC, Lung DC, et al. Temporal

176 profiles of viral load in posterior oropharyngeal saliva samples and serum antibody

177 responses during infection by SARS-CoV-2: an observational cohort study. *Lancet*

178 *Infect Dis* 2020;20:565-574.

179 5. V Wölfel R, Corman VM, Guggemos W, Seilmaier M, Zange S, Müller MA, et al.

180 Virological assessment of hospitalized patients with COVID-2019. *Nature*

181 2020;581:465-469.

182 6. Bullard J, Dust K, Funk D, Strong JE, Alexander D, Garnett L, et al. Predicting

183 infectious SARS-CoV-2 from diagnostic samples. *Clin Infect Dis* 2020 ; ciaa638. doi:

184 10.1093/cid/ciaa638.



- 185 7. Schlomchik M, Janeway C, Travers P, Walport M, Schlomchik M. The distribution  
186 and functions of immunoglobulin isotypes. In: *Immunobiology: The Immune System in*  
187 *Health and Disease*, 5th ed. Garland Publishing, New York, NY, 2001.
- 188 8. Long QX, Liu BZ, Deng HJ, Wu GC, Deng K, Chen YK, et al. Antibody responses to  
189 SARS-CoV-2 in patients with COVID-19. *Nat Med* 2020 Apr 29. doi: 10.1038/s41591-  
190 020-0897-1.
- 191 9. Teng G, Papavasiliou FN. Immunoglobulin somatic hypermutation. *Annu Rev Genet*  
192 2007;41:107-120.
- 193 10. Hazell SL. Clinical utility of avidity assays. *Expert Opin. Med. Diagn* 2007 ; 1:511–  
194 519.
- 195 11. Wang Q, Du Q, Guo B, Mu D, Lu X, Ma Q, et al. A Method To Prevent SARS-  
196 CoV-2 IgM False Positives in Gold Immunochromatography and Enzyme-Linked  
197 Immunosorbent Assays. *J Clin Microbiol* 2020 ; 58(6):e00375-20.
- 198 12. Blasco ML, Buesa J, Colomina J, Forner MJ, Galindo MJ, Navarro J, et al. Co-  
199 detection of respiratory pathogens in patients hospitalized with Coronavirus viral  
200 disease-2019 pneumonia. *J Med Virol* 2020 Apr 22. doi: 10.1002/jmv.25922.
- 201 13. Torres I, Albert E, Navarro D. Pooling of nasopharyngeal swab specimens for  
202 SARS-CoV-2 detection by RT-PCR. *J Med Virol* 2020 May 5:10.1002/jmv.25971. doi:  
203 10.1002/jmv.25971.
- 204 14. Package Insert. ALLTEST 2019-nCoV IgG/IgM Rapid Test Cassette, Hangzhou  
205 ALLTEST Biotech Co., Ltd. Hangzhou, China. <https://www.siloambio->  
206 [tech.com/en/product\\_1297294.html](https://www.siloambio-tech.com/en/product_1297294.html).

207
